# Supplementary material for: Pitfalls associated with evaluating enzymatic quorum quenching activity: the case of MomL and its effect on Pseudomonas aeruginosa and Acinetobacter baumannii biofilms
Source: PeerJ. 2017 Apr 27;5:e3251. doi: 10.7717/peerj.3251 (PMC5410158; doi:10.7717/peerj.3251)
Supplement: Data S1 [file peerj-05-3251-s003.xlsx]

## Sheet: Sheet1
Degradation of 3-OH-C12-HSL
	OD492			OD620
	1	2	3	1	2	3
Blank	0.147	0.147	0.143	0.132	0.133	0.13
Ctrl	0.205	0.209	0.196	0.425	0.44	0.409
0,05μg/mL MomL	0.188	0.2	0.205	0.383	0.408	0.421
0,25μg/mL MomL	0.171	0.132	0.116	0.274	0.206	0.165
0,5μg/mL MomL	0.115	0.12	0.123	0.162	0.166	0.184
1μg/mL MomL	0.118	0.121	0.122	0.112	0.116	0.119
5μg/mL MomL	0.123	0.127	0.141	0.117	0.119	0.129
normalized β-galactosidase activity
	1	2	3	Average	Average-Blank	SD
Blank	0.223012	0.231745	0.237318	0.230692		0.0072114
Ctrl	2.3603	2.44407	2.39547	2.39995	2.16926	0.0420676
0,05μg/mL MomL	2.26873	2.2757	2.31029	2.28491	2.05421	0.0222582
0,25μg/mL MomL	1.3199	1.24193	0.997189	1.18634	0.955647	0.168384
0,5μg/mL MomL	0.973958	0.931488	1.12491	1.01012	0.779426	0.101653
1μg/mL MomL	0.289478	0.302037	0.324246	0.305253	0.0745618	0.0176056
5μg/mL MomL	0.292198	0.273554	0.244808	0.270187	0.0394951	0.0238738

## Sheet: Sheet2
Crystal violet staining result for biofilm formation assay
P. aeruginosa PAO1
	I										II										III
	1	2	3	4	5	6	7	8	9	10	1	2	3	4	5	6	7	8	9	10	1	2	3	4	5	6	7	8	9	10	Average	Average-Blank	SD
Blank	0.161	0.161	0.142	0.146		0.225	0.203	0.152	0.141	0.132	0.173	0.159	0.156	0.28	0.164	0.145	0.168	0.164	0.157	0.139	0.155	0.156	0.159	0.204	0.2	0.166	0.221	0.167	0.165	0.174	0.170172		0.0329267
Ctrl	3.512	2.137	1.758	2.311	1.662	2.681	2.271	2.845	1.844	2.261		2.295	3.919	2.051	2.509	2.5	2.298	2.264	2.664	1.818	2.259		2.341	2.251	2.479		1.985	2.353	2.606	1.995	2.36552	2.19535	0.433687
MomL(25 μg/mL)	2	2.002	1.576	1.754	2.215	1.961	1.682	1.744	2.241	3.181	1.924	2.126	2.498	3.155	2.773	4.961	2.21	2.289	1.883	1.882	3.299	2.724	1.992	1.808	2.89	1.662	1.459	1.92	1.797	1.732	2.24467	2.07449	0.760557
MomL(50 μg/mL)	2.155	1.972	1.647	1.282	1.892	1.119	1.056	1.198	1.592	1.818	2.205	2.149	2.095	4.961	2.006	1.641	1.679	4.961	1.92	1.869	1.685	2.064	2.036	1.76	1.439	1.092	1.084	2.138	1.365	1.716	1.91987	1.74969	0.977756
MomL(100 μg/mL)	1.288	1.465	1.26	1.491	1.377	1.222	1.542	1.374	1.405	1.422	2.771	1.951	2.694	1.777	2.543	1.821	2.622	2.004	1.865	1.679	2.428	2.223	2.468		1.441	1.748	2.35	1.476	1.803	1.825	1.83914	1.66897	0.468724
MomL(150 μg/mL)	1.679	1.413	0.898	1.138	2.243	1.376	1.435	1.156	1.102	0.872	1.653	1.701	1.771	1.897	1.517	3.289	1.959	1.911	1.59	1.539	1.823	1.386	2.177	1.608	1.377	1.255	1.151	2.161	1.369	1.342	1.59293	1.42276	0.478652
A. baumannii LMG10531
	I										II										III
	1	2	3	4	5	6	7	8	9	10	1	2	3	4	5	6	7	8	9	10	1	2	3	4	5	6	7	8	9	10	Average	Average-Blank	SD
Blank	0.137	0.12	0.226	0.134	0.133	0.137	0.122	0.144	0.137	0.14	0.2	0.185	0.206	0.194	0.212	0.374	0.208	0.225	0.209	0.197	0.191	0.141	0.149	0.15	0.153	0.153	0.157	0.167	0.183	0.173	0.175233		0.0498201
Ctrl	1.274	0.88	1.028	1.012	0.929	1.126	0.918	0.763	0.797	1.415	1.145	1.253	1.434	1.208	1.469	1.056	1.289	1.07	1.097	1.142	0.958	1.003	1.344	1.279	1.1	1.086	1.145	0.832	0.884	0.975	1.09703	0.926861	0.195545
MomL(0,1 μg/mL)	0.908	0.829	1.335	0.794	0.783	0.956	0.714	0.799	0.803	0.862			1.179		1.273	1.144	1.07	0.861	0.841	0.957	0.988	1.003	0.805	0.723	0.608	0.793	0.796	0.768	0.697	0.603	0.884889	0.714716	0.178808
MomL(1 μg/mL)	0.935	0.584	1.217	0.654	0.645	0.523	0.629	0.582	0.59	0.507	0.982	1.091	1.014	1.018	1.331	1.068	1.003	0.709	0.879	0.906	0.827	0.787	0.708	0.606	0.578	0.568	0.706	0.897	0.706	0.811	0.802033	0.631861	0.213366
MomL(5 μg/mL)	0.782	0.65	0.693	0.623	0.95	0.671	1.041	0.621	0.674	0.828	1.073	0.788	0.832	1.013	0.738	0.658	0.667	0.689	0.762	0.709	0.935	0.637	0.644	0.726	0.591	0.446	0.567	0.528	0.542	0.504	0.7194	0.549228	0.165226
MomL(25 μg/mL)	0.498	0.463	0.705	0.622	0.668	0.56	0.533	0.547	0.686	0.679	0.771	0.822	0.902	0.833	0.841	0.847	0.987	1.039	1.048	0.833	0.749	0.635	0.595	0.689	0.625	0.527	0.578	0.545	0.621	0.702	0.705	0.534828	0.159

## Sheet: Sheet3
Plating results for biofilm susceptibility assay
P. aeruginosa PAO1
	I			II			III			Average	SD			I			II			III			Average	SD
CFU/biofilm	1	2	3	1	2	3	1	2	3				Log CFU/biofilm	1	2	3	1	2	3	1	2	3
Ctrl	14800000	1600000	15200000	15600000	15700000	15200000	24000000	13650000	14300000	14450000	5.71314e+06		Ctrl	7.17026	6.20412	7.18184	7.19312	7.1959	7.18184	7.38021	7.13513	7.15534	7.15987	0.171708
MomL	9150000	10600000	13800000	5000000	5550000	8700000	5800000	5950000	6400000	7.88333e+06	2.93034e+06		MomL	6.96142	7.02531	7.13988	6.69897	6.74429	6.93952	6.76343	6.77452	6.80618	6.89671	0.161433
CIP	186000	500000	47000	121000	146000	110000	15500	168000	29600	147011	145642		CIP	5.26951	5.69897	4.6721	5.08279	5.16435	5.04139	4.19033	5.22531	4.47129	5.16735	0.430249
CIP+MomL	46500	86500	82000	33000	40500	44500	27000	24500	7850	43594.4	25895.4		CIP+MomL	4.66745	4.93702	4.91381	4.51851	4.60746	4.64836	4.43136	4.38917	3.89487	4.63943	0.257974
MEM	2500000	9900000	5000000	2650000	3700000	4950000	11900000	8650000	9050000	6.47778e+06	3.44883e+06		MEM	6.39794	6.99564	6.69897	6.42325	6.5682	6.69461	7.07555	6.93702	6.95665	6.81143	0.231223
MEM+MomL	1420000	1490000	2300000	1520000	1700000	1600000	1.255e+06	1275000	1460000	1.55778e+06	312071		MEM+MomL	6.15229	6.17319	6.36173	6.18184	6.23045	6.20412	6.09864	6.10551	6.16435	6.19251	0.0870025
CST	1.34e+07	15900000	13300000	8800000	7600000	25400000	19200000	18400000	9800000	1.46444e+07	5.4029e+06		CST	7.1271	7.2014	7.12385	6.94448	6.88081	7.40483	7.2833	7.26482	6.99123	7.16567	0.160228
CST+MomL	7400000	5750000	6500000	8600000	5800000	15400000	10800000	7400000	5300000	8.10556e+06	3.03722e+06		CST+MomL	6.86923	6.75967	6.81291	6.9345	6.76343	7.18752	7.03342	6.86923	6.72428	6.90878	0.162734
TOB	4900000	2100000	5150000	3560000	3800000	2610000	500000	505000	1180000	2.70056e+06	1.77231e+06		TOB	6.6902	6.32222	6.71181	6.55145	6.57978	6.41664	5.69897	5.70329	6.07188	6.43145	0.285017
TOB+MomL	1240000	2900000	3200000	1300000	2450000	695000	510000	395000	615000	1.47833e+06	1.08905e+06		TOB+MomL	6.09342	6.4624	6.50515	6.11394	6.38917	5.84198	5.70757	5.5966	5.78888	6.16977	0.319934
A. baumannii LMG10531
	I			II			III			Average	SD			I			II			III			Average	SD
CFU/biofilm	1	2	3	1	2	3	1	2	3				Log CFU/biofilm	1	2	3	1	2	3	1	2	3
Ctrl	7050000	13200000	13750000	16800000	9450000	15800000	1.015e+07	17650000	10300000	1.26833e+07	3.44835e+06		Ctrl	6.84819	7.12057	7.1383	7.22531	6.97543	7.19866	7.00647	7.24674	7.01284	7.10323	0.118076
MomL	6150000	4900000	5850000	9000000	7250000	8000000	4950000	8100000	6700000	6.76667e+06	1.35524e+06		MomL	6.78888	6.6902	6.76716	6.95424	6.86034	6.90309	6.69461	6.90849	6.82607	6.83037	0.0869811
CIP	2640000	1430000	3250000	1300000	1680000	970000	1055000	1020000	485000	1.53667e+06	827771		CIP	6.4216	6.15534	6.51188	6.11394	6.22531	5.98677	6.02325	6.0086	5.68574	6.18658	0.233946
CIP+MomL	470000	595000	830000	680000	380000	545000	325000	655000	710000	576667	154020		CIP+MomL	5.6721	5.77452	5.91908	5.83251	5.57978	5.7364	5.51188	5.81624	5.85126	5.76092	0.115994
MEM	3750000	4850000	5900000	12500000	8350000	10500000	2.615e+07	13250000	7750000	1.03333e+07	6.38631e+06		MEM	6.57403	6.68574	6.77085	7.09691	6.92169	7.02119	7.41747	7.12222	6.8893	7.01424	0.268407
MEM+MomL	2500000	5600000	4200000	7300000	4200000	4850000	1625000	3650000	3800000	4.19167e+06	1.56258e+06		MEM+MomL	6.39794	6.74819	6.62325	6.86332	6.62325	6.68574	6.21085	6.56229	6.57978	6.62239	0.161898
CST	400000	132500	895000	360000	620000	240000	232500	410000	485000	419444	217092		CST	5.60206	5.12222	5.95182	5.5563	5.79239	5.38021	5.36642	5.61278	5.68574	5.62267	0.224778
CST+MomL	54000	425000	93000	175000	225000	180000	141000	97200	93500	164856	105048		CST+MomL	4.73239	5.62839	4.96848	5.24304	5.35218	5.25527	5.14922	4.98767	4.97081	5.2171	0.276737
TOB	24000	2000	9100	15800	36000	68000	29200	36600	8450	25461.1	19036.9		TOB	4.38021	3.30103	3.95904	4.19866	4.5563	4.83251	4.46538	4.56348	3.92686	4.40588	0.324716
TOB+MomL	340	1740	3200	6200	8300	3150	6200	8300	3150	4508.89	2685.71		TOB+MomL	2.53148	3.24055	3.50515	3.79239	3.91908	3.49831	3.79239	3.91908	3.49831	3.65407	0.258687

## Sheet: Sheet4
Plating results for effect of MomL on dual-species biofilm
Effect of MomL on 24h dual-species biofilm
CFU/biofilm		I			II			III			Average	SD		Log CFU/biofilm		I			II			III			Average	SD
		1	2	3	1	2	3	1	2	3						1	2	3	1	2	3	1	2	3
CtrL	TSA	23900000	112000000	141000000	31000000	100000000	61500000	37000000	48800000	21300000	6.40556e+07	4.0846e+07		CtrL	TSA	7.3784	8.04922	8.14922	7.49136	8	7.78888	7.5682	7.68842	7.32838	7.80656	0.276934
	PIA	2.3e+07	66500000	136000000	27700000	79000000	50000000	12500000	29000000	20400000	4.93444e+07	3.72008e+07			PIA	7.36173	7.82282	8.13354	7.44248	7.89763	7.69897	7.09691	7.4624	7.30963	7.69324	0.327415
	TSA(CFS)	7700000	9850000	7150000	1000000	2.22e+06	1850000	6100000	3420000	1350000	4.51556e+06	3.0551e+06			TSA(CFS)	6.88649	6.99344	6.85431	6	6.34635	6.26717	6.78533	6.53403	6.13033	6.65471	0.293831
MomL	TSA	94000000	176500000	141000000	96500000	83500000	86000000	42500000	28000000	14500000	8.47222e+07	4.91591e+07		MomL	TSA	7.97313	8.24674	8.14922	7.98453	7.92169	7.9345	7.62839	7.44716	7.16137	7.928	0.251994
	PIA	73500000	186000000	176000000	117000000	54000000	4.4e+07	18500000	26600000	12600000	7.86889e+07	6.23577e+07			PIA	7.86629	8.26951	8.24551	8.06819	7.73239	7.64345	7.26717	7.42488	7.10037	7.89591	0.34416
	TSA(CFS)	1270000	1800000	660000	615000	775000	500000	527000	210000	650000	778556	448001			TSA(CFS)	6.1038	6.25527	5.81954	5.78888	5.8893	5.69897	5.72181	5.32222	5.81291	5.89129	0.249904
Effect of MomL (or in combination of tobramycin) on 48h dual-species biofilm
CFU/biofilm		I		II		III		Average	SD		Log CFU/biofilm		I		II		III		Average	SD
		1	2	1	2	1	2						1	2	1	2	1	2
CtrL	TSA	27100000	25200000	32000000	71000000	4.85e+07	2.68e+07	3.84333e+07	1.8123e+07		CtrL	TSA	7.43297	7.4014	7.50515	7.85126	7.68574	7.42813	7.58471	0.204789
	PIA	24000000	2.01e+07	2.45e+07	43000000	32000000	26900000	2.84167e+07	8.14651e+06			PIA	7.38021	7.3032	7.38917	7.63347	7.50515	7.42975	7.45357	0.124504
	TSA(CFS)	150	0	10	10	30	310	85	123.572			TSA(CFS)	2.17609	0	1	1	1.47712	2.49136	1.92942	0.631371
MomL	TSA	4.4e+07	31500000	48000000	77000000	21600000	2.18e+07	40650000	2.09214e+07		MomL	TSA	7.64345	7.49831	7.68124	7.88649	7.33445	7.33846	7.60906	0.223519
	PIA	49500000	36000000	32000000	73000000	31000000	24600000	4.10167e+07	1.77269e+07			PIA	7.69461	7.5563	7.50515	7.86332	7.49136	7.39094	7.61296	0.187696
	TSA(CFS)	10	20	70	10	50	0	26.6667	27.3252			TSA(CFS)	1	1.30103	1.8451	1	1.69897	0	1.42597	0.445019
Tob	TSA	3780000	6200000	7550000	42200000	19300000	16700000	15955000	1.42448e+07		Tob	TSA	6.57749	6.79239	6.87795	7.62531	7.28556	7.22272	7.2029	0.387744
	PIA	3250000	4600000	3900000	30000000	12600000	12100000	11075000	1.01604e+07			PIA	6.51188	6.66276	6.59106	7.47712	7.10037	7.08279	7.04434	0.398429
	TSA(CFS)	10	680	160	10	0	0	143.333	270.16			TSA(CFS)	1	2.83251	2.20412	1	0	0	2.15635	0.818576
Tob+MomL	TSA	9600000	10400000	4500000	20400000	15000000	13200000	1.21833e+07	5.392e+06		Tob+MomL	TSA	6.98227	7.01703	6.65321	7.30963	7.17609	7.12057	7.08577	0.192207
	PIA	4150000	7250000	5550000	17900000	17700000	14200000	11125000	6.21826e+06			PIA	6.61805	6.86034	6.74429	7.25285	7.24797	7.15229	7.0463	0.242747
	TSA(CFS)	10	540	690	220	0	30	248.333	299.026			TSA(CFS)	1	2.73239	2.83885	2.34242	0	1.47712	2.39504	0.522948

## Sheet: Sheet5
Plating results in wound model
P. aeruginosa PAO1
	I		II		III		Average	SD			I		II		III		Average	SD
	1	2	1	2	1	2					1	2	1	2	1	2
CTRL	292000000	550000000	552000000	202000000	141000000	222000000	326500000	1.80457e+08		CTRL	8.46538	8.74036	8.74194	8.30535	8.14922	8.34635	8.51388	0.240035
MomL	688000000	628000000	668000000	122000000	226000000	130000000	4.10333e+08	2.78054e+08		MomL	8.83759	8.79796	8.82478	8.08636	8.35411	8.11394	8.61314	0.294291
Tobramycin	6000	76000	57500	2190000	640000	260000	538250	841919		Tobramycin	3.77815	4.88081	4.75967	6.34044	5.80618	5.41497	5.73098	0.679314
Tob+MomL	86000	33000	114000	770000	140000	320000	243833	275555		Tob+MomL	4.9345	4.51851	5.0569	5.88649	5.14613	5.50515	5.38709	0.490794
A. baumannii LMG10531
	I		II		III		Average	SD			I		II		III		Average	SD
	1	2	1	2	1	2					1	2	1	2	1	2
CTRL	164000000	161000000	119000000	206000000	134000000	104000000	148000000	3.6775e+07		CTRL	8.21484	8.20683	8.07555	8.31387	8.1271	8.01703	8.17026	0.107913
MomL	194000000	236000000	143000000	69000000	133000000	138000000	1.52167e+08	5.71784e+07		MomL	8.2878	8.37291	8.15534	7.83885	8.12385	8.13988	8.18232	0.163191
Tobramycin	24800000	58000000	33500000	55000000	55000000	28000000	4.23833e+07	1.52132e+07		Tobramycin	7.39445	7.76343	7.52504	7.74036	7.74036	7.44716	7.6272	0.155887
Tob+MomL	15750000	19000000	6700000	39000000	62000000	40000000	3.04083e+07	2.03517e+07		Tob+MomL	7.19728	7.27875	6.82607	7.59106	7.79239	7.60206	7.48299	0.290664

## Sheet: Sheet6
Results for other Acinetobacter strains
Crystal violet staining results for LMG 10517, LMG 10520, M2, AB5075
A. calcoaceticus LMG 10517
	I										II										III
	1	2	3	4	5	6	7	8	9	10	1	2	3	4	5	6	7	8	9	10	1	2	3	4	5	6	7	8	9	10	Average	Average-Blank	SD
Blank	0.194	0.187	0.187	0.26	0.25	0.16	0.171	0.155	0.191	0.147	0.156	0.183	0.169	0.17	0.188	0.199	0.179	0.225	0.179	0.162	0.14	0.143	0.145	0.141	0.145	0.144	0.141	0.149	0.139	0.172	0.172367		0.0221124
Ctrl	1.2	1.606	1.417	1.535	1.408	1.201	1.407	1.163	1.842	1.225	1.067	1.177	1.173	1.344	1.187	1.333	0.98	0.991	0.999	0.949	0.65	0.792	0.787	0.892	1.072	0.858	0.734	0.783	0.704	0.731	1.1069	0.934533	0.274458
MomL(5 μg/mL)	1.609	1.22	1.186	1.604	1.357	1.492	1.186	1.385	1.145	1.066	1.072	1.178	1.676	1.079	1	1.376	1.007	1.183	0.994	0.845	0.791	0.878	0.916	1.224	1.038	0.961	0.875	0.963	0.79	0.818	1.13047	0.9581	0.224729
MomL(50 μg/mL)	1.62	1.436	1.386	1.587	1.064	1.182	1.326	1.199	1.588	1.491	1.32	1.158	1.581	1.159	1.133	1.337	1.581	1.092	0.966	0.863	0.632	0.697	0.88	1.032	0.757	1.007	1.55	0.836	0.8	0.813	1.1691	0.996733	0.296096
MomL(150 μg/mL)	1.526	1.508	1.565	1.42	1.549	1.5	1.155	1.244	1.232	1.357	1.195	1.174	1.106	1.107	1.197	1.015	0.941	0.849	0.902	1.234	0.858	1.547	0.826	0.771	0.867	0.516	0.982	0.937	0.739	0.97	1.1263	0.953933	0.2418
MomL(200 μg/mL)	1.727	1.644	1.728	1.156	1.167	1.567	1.253	1.366	1.43	1.241	1.31	1.175	0.976	1.083	1.029	0.974	1.207	1.077	0.797	0.83	0.645	0.819	0.656	0.88	1.529	0.705	0.615	0.65	0.651	0.656	1.08477	0.9124	0.301779
A. baumannii LMG 10520
	I										II										III
	1	2	3	4	5	6	7	8	9	10	1	2	3	4	5	6	7	8	9	10	1	2	3	4	5	6	7	8	9	10	Average	Average-Blank	SD
Blank	0.208	0.15	0.159	0.162	0.164	0.158	0.148	0.139	0.134	0.146	0.213	0.159	0.149	0.146	0.18	0.228	0.175	0.145		0.148	0.15	0.147	0.15	0.161	0.156	0.16	0.159	0.145	0.156	0.163	0.160621		0.0216865
Ctrl	1.229	2.365	1.692	2.157	1.95	2.619	2.045	1.458	1.546	0.934	1.781	1.82	1.381	1.721	1.478	1.63	0.964	1.203	1.442	1.388	1.027	1.102	1.12	1.386	1.183	1.036	1.109	1.342	0.854	1.442	1.48013	1.31951	0.394367
MomL(5 μg/mL)	1.299	1.692	2.732	2.362	0.759	1.492	2.171	1.347	1.427	0.599	1.502	1.114	2.309	1.305	0.918	0.932	1.042	0.879	0.943	0.825	0.702	0.748	1.135	0.7	0.831	0.795	0.884	0.785	1.177	1.065	1.2157	1.05508	0.426238
MomL(50 μg/mL)	1.133	1.217	1.083	0.872	1.173	1.102	1.052	0.978	0.663	1.252	0.949	0.928	0.697	0.745	0.68	0.623	0.632	0.674	0.694	0.755	0.738	0.644	0.843	0.788	0.784	0.708	0.861	0.719	0.535	0.55	0.835733	0.675113	0.175604
MomL(150 μg/mL)	1.023	0.701	0.726	0.821	1.116	0.9	1.04	0.985	0.739	0.853	1.032	0.987	0.874	0.735	0.875	0.695	1.014	0.68	0.813	1.138	0.806	0.888	0.995	0.744	0.755	0.53	0.844	0.766	0.623	0.787	0.8495	0.688879	0.145536
MomL(200 μg/mL)	1.238	0.859	0.915	0.836	1.08	0.719	1.017	0.956	0.764	1.102	0.937	0.926	0.974	0.925	0.849	0.902	0.781	0.695	0.827	0.504	0.944	1.11	0.729	0.938	1.016	0.661	0.687	0.824	0.821	0.805	0.878033	0.717413	0.144973
A. nosocomiallis M2
	I										II										III
	1	2	3	4	5	6	7	8	9	10	1	2	3	4	5	6	7	8	9	10	1	2	3	4	5	6	7	8	9	10	Average	Average-Blank	SD
Blank	0.208	0.208	0.203	0.204	0.212	0.208	0.202	0.202	0.209	0.2	0.187	0.137	0.153	0.14	0.195	0.141	0.159	0.168	0.146	0.135	0.168	0.17	0.137	0.145	0.189	0.155	0.145	0.142	0.138	0.131	0.171233		0.0268125
Ctrl	1.003	1.032	0.572	0.688	0.83	0.904	0.817	0.773	0.807	0.844	0.755	0.984	0.877	0.712	0.784	0.44	0.588	0.587	0.689	0.702	1.047	0.98	0.93	0.886	1.055	0.972	0.982	0.838	1.041	0.888	0.833567	0.662333	0.156399
MomL(5 μg/mL)	1.078	0.908	0.743	0.761	0.626	0.947	0.88	0.83	0.786	0.955	0.872	0.882	0.738	0.941	0.788	0.798	0.828	1.201	0.743	0.691	0.855	0.912	0.805	0.76	0.714	0.98	0.994	1.024	0.887	0.732	0.8553	0.684067	0.116795
MomL(50 μg/mL)	0.867	0.724	0.776	0.849	0.814	0.755	0.812	0.705	0.66	0.614	0.88	0.894	0.924	0.787	0.632	0.58	0.746	0.715	0.848	0.599	0.941	0.868	0.845	0.86	0.97	1.047	1.093	0.885	1.033	1.205	0.830933	0.6597	0.16135
MomL(150 μg/mL)	0.838	0.957	0.884	0.806	0.834	0.841	0.768	0.745	0.76	0.87	0.947	0.993	0.785	0.933	1.105	0.753	0.543	0.619	1.124	0.714	0.903	0.992	1.234	0.884	0.972	1.132	1.13	0.925	0.802	0.632	0.880833	0.7096	0.177183
MomL(200 μg/mL)	0.873	1.043	0.944	0.795	0.636	0.803	0.892	1.134	0.784	0.872	1.032	1.03	0.825	0.702	0.532	0.626	0.743	0.617	0.709	0.693	0.699	0.85	0.852	0.984	0.629	0.88	0.834	0.774	0.89	0.645	0.810733	0.6395	0.147169
A. baumannii AB5075
	I										II										III
	1	2	3	4	5	6	7	8	9	10	1	2	3	4	5	6	7	8	9	10	1	2	3	4	5	6	7	8	9	10	Average	Average-Blank	SD
Blank	0.2	0.222	0.202	0.22	0.195	0.219	0.205	0.223	0.196	0.202	0.214	0.215	0.217	0.216	0.218	0.224	0.234	0.212	0.203	0.202	0.182	0.181	0.187	0.176	0.179	0.194	0.193	0.192	0.188	0.167	0.2026		0.0174477
Ctrl	1.092	0.849	0.776	1.147	0.847	0.718	0.928	0.617	0.734	0.859	0.584	0.724	0.823	1.029	0.938	0.772	0.875	0.82	0.749	0.796	0.638	0.754	0.654	0.659	0.605	0.598	0.549	0.524	0.497	0.642	0.7599	0.5573	0.137857
MomL(5 μg/mL)	0.952	0.794	0.803	0.925	0.946	0.978	0.838	0.819	0.79	0.546	0.631	0.888	0.754	0.82	0.89	0.82	1.053	0.926	0.991	0.524	0.902	0.865	0.707	0.63	0.724	0.64	0.814	0.679	0.768	0.779	0.806533	0.603933	0.134755
MomL(50 μg/mL)	0.702	0.817	0.591	0.638	0.757	0.613	0.555	0.656	0.637	0.87	0.681	0.642	0.641	0.619	0.652	0.815	0.639	0.712	0.721	0.983	0.557	0.645	0.525	0.524	0.679	0.683	0.748	0.711	0.869	1.054	0.697867	0.495267	0.132131
MomL(150 μg/mL)	0.634	0.825	0.736	0.756	0.836	0.77	0.754	0.68	0.718	0.681	0.914	0.767	0.838	0.996	1.101	1.027	0.753	0.8	0.762	0.877	0.79	0.795	0.657	0.82	0.76	0.731	0.666	0.481	0.503	0.975	0.7801	0.5775	0.144906
MomL(200 μg/mL)	0.703	0.675	0.558	0.61	0.661	0.519	0.496	0.642	0.709	0.772	0.794	0.716	0.704	0.521	0.589	0.846	0.757	0.602	1.02	0.705	0.624	0.85	0.68	0.89	0.855	0.797	0.823	1.106		0.713	0.721966	0.519366	0.149692
Plating results for LMG 10517, LMG 10520 biofilm susceptibility assay
A. calcoaceticus LMG 10517
	I			II							I			II
CFU/biofilm	1	2	3	1	2	3	Average	SD		Log CFU/biofilm	1	2	3	1	2	3	Average	SD
Ctrl	1170000	1720000	3560000	2070000	4400000	3350000	2.71167e+06	1.24495e+06		Ctrl	6.06819	6.23553	6.55145	6.31597	6.64345	6.52504	6.43324	0.199388
MomL	2900000	1400000	2100000	3750000	4100000	3650000	2.98333e+06	1.05578e+06		MomL	6.4624	6.14613	6.32222	6.57403	6.61278	6.56229	6.4747	0.153693
CIP	41000	230000	290000	184000	167500	505000	236250	155392		CIP	4.61278	5.36173	5.4624	5.26482	5.22401	5.70329	5.37337	0.285655
CIP+MomL	1200000	550000	1150000	1440000	84000	56000	746667	600621		CIP+MomL	6.07918	5.74036	6.0607	6.15836	4.92428	4.74819	5.87313	0.349348
MEM	1170000	4140000	1160000	1160000	2850000	1760000	2040000	1.22067e+06		MEM	6.06819	6.617	6.06446	6.06446	6.45484	6.24551	6.30963	0.259868
MEM+MomL	2650000	4800000	2920000	2430000	2100000	2000000	2.81667e+06	1.02977e+06		MEM+MomL	6.42325	6.68124	6.46538	6.38561	6.32222	6.30103	6.44974	0.158778
CST	325000	124000	9550	67500	205000	223000	159008	114630		CST	5.51188	5.09342	3.98	4.8293	5.31175	5.3483	5.20142	0.313086
CST+MomL	56500	4450	4500	1400000	320000	805000	431742	564845		CST+MomL	4.75205	3.64836	3.65321	6.14613	5.50515	5.9058	5.63522	0.568185
TOB	42000	84500	70500	5350	4900	247000	75708.3	90050.7		TOB	4.62325	4.92686	4.84819	3.72835	3.6902	5.3927	4.87914	0.516568
TOB+MomL	60000	269000	12600	4800	1240	72500	70023.3	101962		TOB+MomL	4.77815	5.42975	4.10037	3.68124	3.09342	4.86034	4.84524	0.632381
A. baumannii LMG 10520
	I			II							I			II
CFU/biofilm	1	2	3	1	2	3	Average	SD		Log CFU/biofilm	1	2	3	1	2	3	Average	SD
Ctrl	3500000	4900000	6000000	5.23e+06	2560000	3350000	4.25667e+06	1.3171e+06		Ctrl	6.54407	6.6902	6.77815	6.7185	6.40824	6.52504	6.62907	0.134379
MomL	1480000	1900000	1450000	1260000	2120000	1970000	1.69667e+06	344596		MomL	6.17026	6.27875	6.16137	6.10037	6.32634	6.29447	6.2296	0.0882061
CIP	2.28e+06	3400000	3570000	2820000	363000	3430000	2.64383e+06	1.21764e+06		CIP	6.35793	6.53148	6.55267	6.45025	5.55991	6.53529	6.42223	0.200018
CIP+MomL	1880000	1050000	470000	1230000	920000	1010000	1.09333e+06	461505		CIP+MomL	6.27416	6.02119	5.6721	6.08991	5.96379	6.00432	6.03875	0.183319
MEM	8500000	5400000	6500000	5461600	3840000	1760000	5243600	2.29609e+06		MEM	6.92942	6.73239	6.81291	6.73732	6.58433	6.24551	6.71963	0.190171
MEM+MomL	775000	1150000	3200000	1050000	1890000	1520000	1597500	875910		MEM+MomL	5.8893	6.0607	6.50515	6.02119	6.27646	6.18184	6.20344	0.238124
CST	490000	360000	380000	445000	271000	210000	359333	104827		CST	5.6902	5.5563	5.57978	5.64836	5.43297	5.32222	5.5555	0.126695
CST+MomL	66500	46000	170000	140000	94700	80500	99616.7	46788.3		CST+MomL	4.82282	4.66276	5.23045	5.14613	4.97635	4.9058	4.99833	0.203981
TOB	6450000	6600000	4500000	5650000	490000	2.47e+06	4360000	2.43386e+06		TOB	6.80956	6.81954	6.65321	6.75205	5.6902	6.3927	6.63949	0.242434
TOB+MomL	1950000	1240000	1090000	1240000	1.36e+06	2.22e+06	1.51667e+06	456538		TOB+MomL	6.29003	6.09342	6.03743	6.09342	6.13354	6.34635	6.18089	0.130729

## Sheet: Sheet7
C. elegans survival assay (infected by Acinetobacter strains)
10 μg/mL MomL
		I						II						III
Number of worms		1		2		3		1		2		3		1		2		3					I			II			III			Average	SD
		Live	Total	Live	Total	Live	Total	Live	Total	Live	Total	Live	Total	Live	Total	Live	Total	Live	Total				1	2	3	1	2	3	1	2	3
Blank Ctrl		16	17	23	25	28	30	31	31	21	22	27	30	21	22	27	29	34	37		Blank Ctrl		0.941176	0.92	0.933333	1	0.954545	0.9	0.954545	0.931034	0.918919	0.939284	0.0286992
MomL Ctrl		17	18	17	18	12	15	19	23	30	31	21	22	27	28	15	17	19	20		MomL Ctrl		0.944444	0.944444	0.8	0.826087	0.967742	0.954545	0.964286	0.882353	0.95	0.914878	0.0631762
LMG 10520		5	10	7	23	6	25	13	26	9	27	14	37	8	28	4	21	11	27		LMG 10520		0.5	0.304348	0.24	0.5	0.333333	0.378378	0.285714	0.190476	0.407407	0.348851	0.107895
MomL+LMG 10520		15	27	10	25	7	16	12	21	11	34	7	28	13	32	14	28	11	26		MomL+LMG 10520		0.555556	0.4	0.4375	0.571429	0.323529	0.25	0.40625	0.5	0.423077	0.429704	0.103664
LMG 10531		18	34	8	21	8	15	6	19	6	18	18	34	12	22	13	33	18	34		LMG 10531		0.529412	0.380952	0.533333	0.315789	0.333333	0.529412	0.545455	0.393939	0.529412	0.45456	0.0963856
MomL+LMG 10531		11	16	4	22	3	19	4	23	11	33	17	35	10	25	12	31	11	20		MomL+LMG 10531		0.6875	0.181818	0.157895	0.173913	0.333333	0.485714	0.4	0.387097	0.55	0.37303	0.182996
50 μg/mL MomL
		I						II						III
Number of worms		1		2		3		1		2		3		1		2		3					I			II			III			Average	SD
		Live	Total	Live	Total	Live	Total	Live	Total	Live	Total	Live	Total	Live	Total	Live	Total	Live	Total				1	2	3	1	2	3	1	2	3
Blank Ctrl		22	23	16	19	18	21	32	34	37	37	34	34	24	26	19	22	18	19		Blank Ctrl		0.956522	0.842105	0.857143	0.941176	1	1	0.923077	0.863636	0.947368	0.92567	0.0594211
MomL Ctrl		17	17	18	19	20	22	36	36	27	29	28	30	26	27	25	28	24	25		MomL Ctrl		1	0.947368	0.909091	1	0.931034	0.933333	0.962963	0.892857	0.96	0.948516	0.0367959
LMG 10520		7	16	10	25	8	26	8	30	8	29	5	21	9	24	5	12	3	14		LMG 10520		0.4375	0.4	0.307692	0.266667	0.275862	0.238095	0.375	0.416667	0.214286	0.325752	0.0829954
MomL+LMG 10520		5	17	13	22	9	27	9	30	5	21	2	21	10	19	6	27	4	17		MomL+LMG 10520		0.294118	0.590909	0.333333	0.3	0.238095	0.0952381	0.526316	0.222222	0.235294	0.315058	0.154494
LMG 10531		5	20	5	23	2	20	10	31	9	25	11	20	8	26	11	27	14	29		LMG 10531		0.25	0.217391	0.1	0.322581	0.36	0.55	0.307692	0.407407	0.482759	0.333092	0.13742
MomL+LMG 10531		4	18	7	22	4	14	7	31	13	32	18	33	16	42	9	28	10	28		MomL+LMG 10531		0.222222	0.318182	0.285714	0.225806	0.40625	0.545455	0.380952	0.321429	0.357143	0.34035	0.0995302

## Sheet: Sheet8
Effect of MomL on cell growth
P. aeruginosa PAO1
	I		II		III
	1	2	1	2	1	2	Average	SD
Ctrl	1.054	0.992	1.008	1.004	1.127	1.066	1.04183	0.051078
MomL 4 μg/mL	1.255	1.035	1.147	1.019	1.013	1.053	1.087	0.0956912
MomL 8 μg/mL	1.257	1.224	1.377	1.264	1.147	1.11	1.22983	0.0946772
MomL 16 μg/mL	1.269	1.326	1.327	1.353	1.378	1.121	1.29567	0.092938
MomL 32 μg/mL	1.348	1.237	1.304	1.336	1.224	1.066	1.2525	0.104479
MomL 64 μg/mL	1.257	1.298	1.429	1.334	1.306	1.159	1.29717	0.0889031
MomL 128 μg/mL	1.242	1.33	1.306	1.345	1.115	1.175	1.25217	0.0921378
MomL 256 μg/mL	1.225	1.214	1.244	1.174	1.031	1.243	1.1885	0.0813013
MomL 512 μg/mL	1.105	1.11	1.154	1.075	1.15	1.14	1.12233	0.0308977
MomL 1024 μg/mL	1.064	1.186	1.169	1.013	1.124	1.117	1.11217	0.0648056
A. baumannii LMG 10531
	I		II		III
	1	2	1	2	1	2	Average	SD
Ctrl	0.628	0.622	0.603	0.61	0.617	0.591	0.611833	0.0134672
MomL 4 μg/mL	0.597	0.557	0.58	0.568	0.532	0.53	0.560667	0.0265456
MomL 8 μg/mL	0.616	0.563	0.591	0.571	0.536	0.509	0.564333	0.0381873
MomL 16 μg/mL	0.637	0.529	0.594	0.601	0.593	0.59	0.590667	0.0348521
MomL 32 μg/mL	0.647	0.603	0.585	0.624	0.57	0.572	0.600167	0.0306687
MomL 64 μg/mL	0.661	0.613	0.615	0.61	0.607	0.576	0.613667	0.0272739
MomL 128 μg/mL	0.64	0.537	0.584	0.612	0.548	0.571	0.582	0.0389102
MomL 256 μg/mL	0.66	0.621	0.621	0.619	0.627	0.568	0.619333	0.0295071
MomL 512 μg/mL	0.683	0.651	0.626	0.664	0.611	0.62	0.6425	0.0280909
MomL 1024 μg/mL	0.704	0.689	0.666	0.697	0.641	0.622	0.669833	0.0328841

## Sheet: Sheet9
MomL activity in C.elegans assay medium
		OD492			OD620			normalized β-galactosidase activity
		1	2	3	1	2	3	1	2	3	Average	Average-Blank	SD
	Blank	0.316	0.295	0.29	0.267	0.262	0.253	0.155949	0.210452	0.19048	0.185627
3-OH-C12	Ctrl	0.266	0.273	0.27	0.513	0.54	0.548	2.00543	2.12281	2.24965	2.12596	1.94034	0.0723383
	1μg/mL MomL	0.19	0.194	0.193	0.165	0.173	0.171	0.185433	0.215069	0.207743	0.202748	0.0171214	0.00619703
	5μg/mL MomL	0.191	0.185	0.179	0.171	0.164	0.162	0.21959	0.20835	0.232087	0.220009	0.034382	0.0118693
